# Supplementary material
Source: HighWire-hosted journal article supplement (https://bmjopen.bmj.com/content/9/7/e029083)
Supplement: inline-supplementary-material-2 [file inline-supplementary-material-2.pdf]

**Supplement 2 (S2):** The provenance of oxytocin ampoules labelled for storage at  $\leq 25^{\circ}\text{C}$ .

| <b>Manufacturer</b> | <b>Batch Number</b> | <b>Expiry date</b> |
|---------------------|---------------------|--------------------|
| AS Grindeks, Latvia | 38611215            | December 2017      |
|                     | 38711215            | December 2017      |
| Biol, Argentina     | 4185                | August 2018        |
|                     | 4254                | September 2018     |
|                     | 4261                | September 2018     |
